# Supplementary material for: Sensitive detection of alkaline phosphatase by dephosphorylation-initiated transcription reaction-mediated dual signal amplification
Source: Royal Society of Chemistry journal article supplement (doi:10.1039/c8cc00540k), 2018-01-01
Supplement: c8cc00540k1.pdf [file c8cc00540k1.pdf]

## Electronic Supplementary Information

### **Sensitive detection of alkaline phosphatase by dephosphorylation-initiated transcription reaction-mediated dual signal amplification**

Fei Ma,<sup>‡,1</sup> Wen-jing Liu,<sup>‡,1</sup> Li Liang,<sup>‡,2</sup> Bo Tang,<sup>\*,1</sup> and Chun-yang Zhang<sup>\*,1</sup>

<sup>1</sup> College of Chemistry, Chemical Engineering and Materials Science, Collaborative Innovation Center of Functionalized Probes for Chemical Imaging in Universities of Shandong, Key Laboratory of Molecular and Nano Probes, Ministry of Education, Shandong Provincial Key Laboratory of Clean Production of Fine Chemicals, Shandong Normal University, Jinan 250014, China

<sup>2</sup> Department of Tumor Chemotherapy and Radiation Sickness, Peking University Third Hospital, Beijing 100191, China

\*Corresponding author. Tel.: +86 0531-86186033; Fax: +86 0531-82615258. E-mail: cyzhang@sdu.edu.cn. Tel.: +86 0531-86180010; Fax: +86 0531-86180017; tangb@sdu.edu.cn.

#### **EXPERIMENTAL SECTION**

**Chemicals and Materials.** All oligonucleotides (Table S1) are synthesized by Sangong Biotechnology (Shanghai, China). Alkaline phosphatase (ALP), 10× CutSmart buffer (500 mM KAc, 200 mM Tris-Ac, 100 mM Mg(Ac)<sub>2</sub>, 1000 µg/ml BSA, pH 7.9), protein phosphatase (PP), uracil DNA glycosylase (UDG), CpG methyltransferase (M. SssI), lambda exonuclease ( $\lambda$  exo), 10×  $\lambda$  exo buffer (670 mM Glycine-KOH, 25 mM MgCl<sub>2</sub>, 50 µg/mL BSA, pH 9.4), RNase inhibitor and streptavidin (SA) are obtained from New England BioLabs (Beverly, MA, USA).

The T7 RiboMAX express large scale RNA production system was obtained from Promega (Madison, WI, USA). Duplex-specific nuclease (DSN) and 10× DSN master buffer (500 mM Tris-HCl, 50 mM MgCl<sub>2</sub> and 10 mM DTT, pH 8.0) are obtained from Evrogen Joint Stock Company (Moscow, Russia). Diethylpyrocarbonate (DEPC) treated water (RNase free) are obtained from TaKaRa Bio. Inc. (Dalian, China). Sodium orthovanadate (Na<sub>3</sub>VO<sub>4</sub>), bovine serum albumin (BSA), catalase, and glucose oxidase (GO) are purchased from Sigma-Aldrich (St. Louis, Missouri, USA). SYBR Gold is purchased from Invitrogen Corporation (California, CA, USA).

**Table S1. Sequence of synthesized oligonucleotides <sup>a</sup>**

| note         | sequence (5'-3')                                           |
|--------------|------------------------------------------------------------|
| T7 promoter  | P-TAA TAC GAC TCA CTA TAG GG                               |
| template     | TAA CAC TGT CTG GTA AAG ATG GCC CTA TAG TGA GTC GTA<br>TTA |
| signal probe | FAM-TAA CAC TGT CTG GTA AAG ATG G-Eclipse                  |

<sup>a</sup> The letter P in T7 promoter indicates the PO<sub>4</sub> modification at the 5' end.

**Preparation of Stock Solutions.** All oligonucleotides were diluted with 1× Tris-EDTA buffer to prepare the stock solutions. The T7 promoter/template duplex were prepared by incubating 1 μM T7 promoter strand with 1 μM template strand in annealing buffer (5 mM Tris-HCl, 50 mM NaCl, pH 8.0) at 95 °C for 5 min, followed by slowly cooling to room temperature. The obtained dsDNA substrates were stored at -20 °C for further use.

**Fluorescent Detection of ALP.** Dephosphorylation was performed in 20 μL of reaction mixture

containing different-concentration ALP, 100 nM dsDNA substrates (T7 promoter/template duplex), 1× CutSmart buffer (50 mM KAc, 20 mM Tris-Ac, 10 mM Mg(Ac)<sub>2</sub>, 100 µg/mL BSA, pH 7.9), and incubated at 37 °C for 30 min, followed by inactivation at 65 °C for 5 min. Then, 1 U of λ exo was added to the mixture and incubated for another 30 min at 37 °C, followed by heating at 90 °C for 5 min to inactive λ exo. The transcription reaction was carried out in 30 µL of solution containing 6 µL of λ exo digestion products at 37 °C for 60 min in T7 RiboMAX express large scale RNA production system. Then 5 µL of DNA transcription products were incubated with a solution containing 1× DSN master buffer (50 mM Tris-HCl, 5 mM MgCl<sub>2</sub>, and 1 mM DTT, pH 8.0), 0.1 U of DSN, 20 U of RNase inhibitor, and 600 nM Taqman probe in a final volume of 30 µL at 55°C for 40 min, and then the sample was subjected to fluorescence measurement. The fluorescence spectra were measured at room temperature using an F-7000 fluorescence spectrophotometer (Hitachi, Japan) equipped with a xenon lamp as the excitation source. The spectra were recorded in the range from 500 to 650 nm at an excitation wavelength of 490 nm. The excitation and emission slits were set for 5.0 and 5.0 nm, respectively. The fluorescence intensity at 520 nm was used for data analysis.

**Gel Electrophoresis.** The reaction products were analyzed by a 12% nondenaturing polyacrylamide gel (PAGE) in 1× TBE buffer (9 mM Tris-HCl, 9 mM boric acid, 0.2 mM EDTA, pH 7.9) at a 110 V constant voltage for 50 min at room temperature. After being stained by SYBR Gold, the gel was imaged by a Bio-Rad ChemiDoc MP Imaging System (Hercules, CA).

**Inhibition Assay.** To evaluate the effect of ALP inhibitor, various-concentration Na<sub>3</sub>VO<sub>4</sub> was incubated with the mixture of 5 U/L ALP, 100 nM dsDNA substrates, 1× CutSmart buffer (50 mM KAc, 20 mM Tris-Ac, 10 mM Mg(Ac)<sub>2</sub>, 100 µg/mL BSA, pH 7.9) at 37 °C for 30 min, followed

by inactivation at 65 °C for 5 min, the ALP activity was measured by the proposed method. The relative activity (RA) of ALP was measured according to:

$$\text{RA (\%)} = \frac{F_i - F_0}{F_t - F_0} \times 100\%$$

where  $F_0$  is the fluorescence intensity in the absence of ALP,  $F_i$  is the fluorescence intensity in the presence of 5 U/L ALP, and  $F_t$  is the fluorescence intensity in the presence of 5 U/L ALP and  $\text{Na}_3\text{VO}_4$ . The  $\text{IC}_{50}$  value was calculated from the curve of RA versus the  $\text{Na}_3\text{VO}_4$  concentration.

**Kinetic Analysis.** To evaluate the enzyme kinetic parameters of ALP, we measured the initial velocity in the presence of 5 U/L ALP and different-concentration DNA substrate in 5 min reaction at 37 °C. The kinetic parameter is fitted to the Michaelis–Menten equation:

$$V = \frac{V_{\max}[S]}{K_m + [S]}$$

where  $V_{\max}$  is the maximum initial velocity, and  $[S]$  is the concentration of T7 promoter substrate, and  $K_m$  is the Michaelis–Menten constant.

**Recovery Assay.** A total volume of 20  $\mu\text{L}$  of reaction mixture containing 1% fetal bovine serum (FBS) spiked with varying-concentration ALP, 100 nM dsDNA substrates, 1 $\times$  CutSmart buffer (50 mM KAc, 20 mM Tris-Ac, 10 mM  $\text{Mg}(\text{Ac})_2$ , 100  $\mu\text{g}/\text{mL}$  BSA, pH 7.9), and incubated at 37 °C for 30 min, followed by inactivation at 65°C for 5 min. The subsequent reactions and measurement followed the above procedures.

**Cell Culture and Preparation of Cell Extracts.** Human cervical carcinoma cell line (HeLa cells) and human embryonic kidney 293 cell line (HEK cells) were cultured in Dulbecco's modified Eagle's medium (DMEM, Invitrogen, USA) supplemented with 10% fetal bovine serum (FBS, Invitrogen, USA) and 1% penicillin-streptomycin in 5%  $\text{CO}_2$  incubator at 37°C. The number of cells was measured by Countstar cell counter. The cells were collected with trypsinization, washed

twice with ice-cold PBS (Gibco, USA, pH 7.4), and centrifuged at 1000 rpm for 5 min. Then the cells were suspended in 100  $\mu$ L of lysis buffer (10 mM Tris-HCl, 150 mM NaCl, 1% NP-40, 0.25 mM sodium deoxycholate, 1.0% glycerol, and 0.1 mM 4-(2-aminoethyl) benzenesulfonyl fluoride hydrochloride, pH 8.0), and incubated on ice for 30 min, followed by centrifugation at 12000 rpm for 20 min at 4°C. The supernatant was transferred into a fresh tube and stored at  $-80^{\circ}\text{C}$ .

**Optimization of Experimental Conditions.** To achieve the best assay performance, various experimental conditions including ALP incubation time, the amount of  $\lambda$  exo, the amount of DSN, DSN reaction temperature and DSN incubation time are optimized. The ratio of  $F/F_0$  was used for assessing the assay performance, where  $F$  is the fluorescence intensity in the presence of 0.5 U/L ALP, and  $F_0$  is the fluorescence intensity in the absence of ALP.

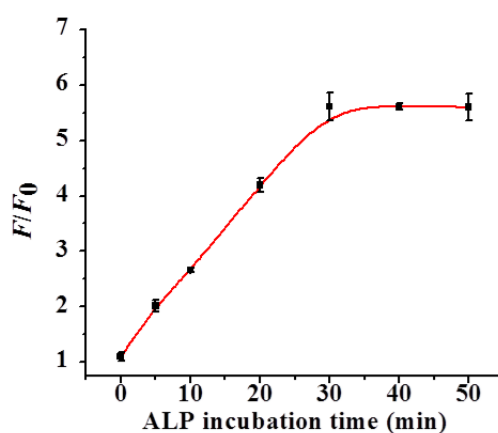

**Fig. S1** Variance of the  $F/F_0$  value with the ALP incubation time. Error bars show the standard deviation of three experiments.

We investigated the effect of ALP incubation time upon the assay performance. After incubation with 0.5 U/L ALP from 0 to 50 min, the samples were measured by the proposed method. As shown in Fig. S1, the  $F/F_0$  value enhances with the incubation time from 0 to 30 min,

and levels off beyond 30 min. This can be explained by either the complete loss of ALP activity after 30 min incubation or the consumption of all available phosphorylated T7 promoter substrates. Therefore, the 30 min is used as the optimized ALP incubation time in the following experiments.

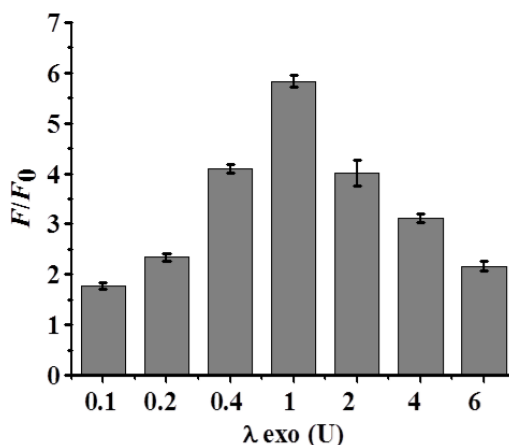

**Fig. S2** Variance of the  $F/F_0$  value with the amount of  $\lambda$  exo. Error bars show the standard deviation of three experiments.

The protection of dephosphorylated T7 promoter substrates from  $\lambda$  exo digestion is a key step in the proposed assay. Therefore, the amount of  $\lambda$  exo should be optimized. As shown in Fig. S2, the  $F/F_0$  value enhances with the increasing concentration of  $\lambda$  exo from 0.1 to 1 U, followed by the decrease beyond the concentration of 1 U. This may be explained by that although 5'-phosphorylated dsDNA is the preferred substrate of  $\lambda$  exo, it can also degrade the non-phosphorylated substrates at a greatly reduced rate.<sup>1</sup> Therefore, 1 U of  $\lambda$  exo is used in the subsequent researches.

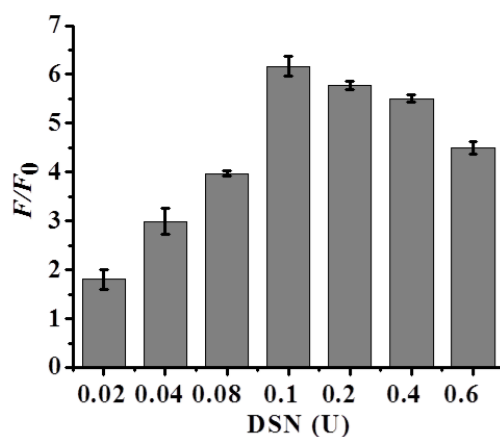

**Fig. S3** Variance of the  $F/F_0$  value with the the amount of DSN. Error bars show the standard deviation of three experiments.

In the proposed assay, DSN-assisted signal amplification is employed for quantitative detection of ALP-induced RNA transcription products. Larger amount of DSN can cleave more signal probes to generate high fluorescence signal, but excess DSN may induce the increase of background signal due to non-specific cleavage of single-stranded Taqman probe.<sup>2</sup> As shown in Fig. S3, the  $F/F_0$  value enhances with the increase of DSN amount from 0.02 to 0.1 U, and slightly decreases when DNS amount is further increased. Therefore, 0.1 U of DSN is used in the subsequent researches.

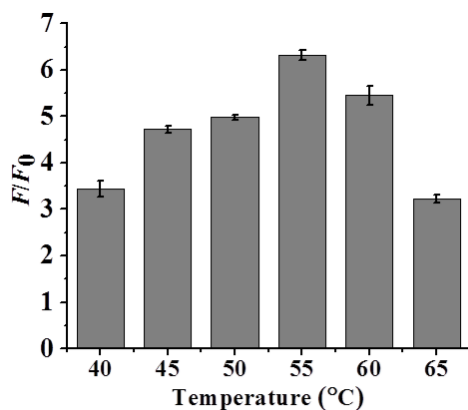

**Fig. S4** Variance of the  $F/F_0$  value with DSN reaction temperature. Error bars show the standard deviation of three experiments.

It is reported that higher temperature can facilitate faster hybridization and subsequent dissociation of RNA in the DSN-mediated cleavage reaction, but it may also weaken the enzyme activity of DSN. We further optimize the temperature of DSN reaction. As shown in Fig. S4, the  $F/F_0$  value enhances with the increase of reaction temperature from 40 to 55 °C, followed by the decrease beyond 55 °C. This sharp decrease may be explained by that the double-strand RNA/DNA substrate required for DSN reaction is denatured when the reaction temperature is higher than 55 °C.<sup>3</sup> Therefore, the optimal temperature of DSN reaction is set as 55 °C in the following experiments.



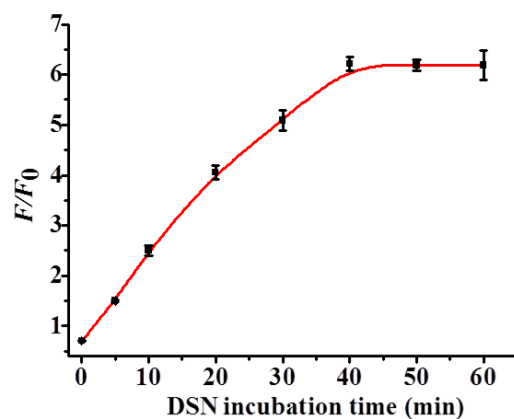

**Fig. S5** Variance of the  $F/F_0$  value with DSN incubation time. Error bars show the standard deviation of three experiments.

Finally, the effect of DSN incubation time upon assay performance is investigated. As shown in Fig. S5, the  $F/F_0$  value enhances with the increase of reaction temperature from 0 to 40 min, and reaches a plateau beyond 40 min. This may be ascribed to either the complete loss of DSN activity after 40 min incubation or the consumption of all available RNA transcripts. Therefore, 40 min is used as the optimal DSN incubation time in the subsequent researches.

**Table S2. Comparison of the proposed method with the reported ALP assays**

| strategy                                            | signal model | assay time* | live cell<br>assay | linear range<br>(U/L) | LOD<br>(U/L) | ref.         |
|-----------------------------------------------------|--------------|-------------|--------------------|-----------------------|--------------|--------------|
| target-induced dual signal<br>amplification         | fluorescence | ~3 h        | yes                | 0.05 – 1              | 0.02         | this<br>work |
| excimer/monomer<br>conversion                       | fluorescence | over 4 days | no                 | 0 – 100               | 0.1          | 4            |
| DNA-scaffolded silver<br>nanocluster-based assay    | fluorescence | ~ 3 h       | no                 | 30 – 240              | 5            | 5            |
| graphene quantum<br>dots-based assay                | fluorescence | ~ 1 h       | no                 | 1 – 90                | 0.45         | 6            |
| target-responsive NIR<br>probe                      | fluorescence | over 1 day  | yes                | 10 – 2000             | 3            | 7            |
| carbon quantum dot-based<br>assay                   | fluorescence | over 3 days | no                 | 4.6 – 383.3           | 1.4          | 8            |
| excited-SIPT and<br>aggregation-induced<br>emission | fluorescence | ~ 1 h       | yes                | 0 – 150               | 0.15         | 9            |
| nucleic acid-controlled<br>quantum dots aggregation | fluorescence | ~5 h        | no                 | 0 – 3                 | 0.1          | 10           |
| gold nanocluster-based<br>assay                     | fluorescence | ~ 12 h      | no                 | 1 – 200               | 0.05         | 11           |

|                                               |                  |        |    |                |       |    |
|-----------------------------------------------|------------------|--------|----|----------------|-------|----|
| copper nanoparticle-based assay               | fluorescence     | ~ 2 h  | no | 0.3 – 7.5      | 0.035 | 12 |
| exonuclease-mediated signal amplification     | electrochemistry | ~ 20 h | no | 1,000 – 20,000 | 100   | 13 |
| hairpin probe-based assay                     | electrochemistry | ~ 9 h  | no | 0.1 – 10       | 0.1   | 14 |
| target-induced gold nanoparticle aggregation  | electrochemistry | ~ 1 h  | no | 32 – 100       | 32    | 15 |
| gold/silver core/shell nanorod-based assay    | electrochemistry | ~ 4 h  | no | 5 – 100        | 3.3   | 16 |
| target-induced aggregation of Ag coated AuNPs | SERS             | ~2 h   | no | 0.5 – 10       | 0.1   | 17 |

<sup>a</sup>LOD: limit of detection (U/L). Ref: references, ICP: infinite coordination polymer, SIPT: state intramolecular proton transfer, NIR: near-infrared, AuNP: gold nanoparticles, SERS: surface-enhanced Raman scattering.

\*Assay time includes the preparation time.

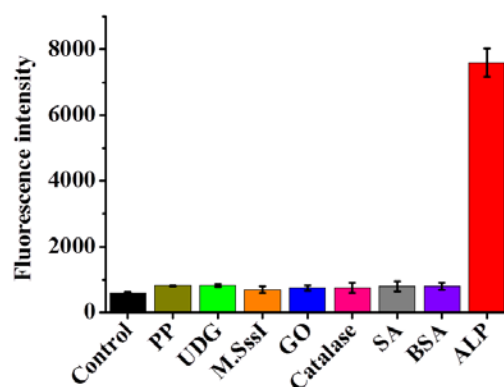

**Fig. S6** Measurement of fluorescence intensity in responses to 5 U/L PP, 5 U/L UDG, 5 U/L M.SssI, 10 mg/L GO, 10 mg/L catalase, 10 mg/L SA, 10 mg/L BSA, and 5 U/L ALP, respectively. Sample without any treatment was used as the control. Error bars show the standard deviation of three experiments.

**Table S3. Recovery of ALP spiked in fetal bovine serum (1%) samples**

| added (U/L) | measured (U/L) | recovery (%) | RSD (%) |
|-------------|----------------|--------------|---------|
| 1           | 1.01           | 101          | 2.75    |
| 2           | 1.98           | 99           | 1.54    |
| 5           | 5.02           | 100.4        | 1.33    |

**Assay Specificity.** To investigate the specificity of the proposed method, protein phosphatase (PP), uracil DNA glycosylase (UDG, 5 U/L), CpG methyltransferase (M. SssI, 5 U/L), glucose oxidase (GO, 10 mg/L), catalase (10 mg/L), streptavidin (SA, 10 mg/L), and bovine serum albumin (BSA, 10 mg/L) were used as the interferences. PP catalyzes the release of phosphate groups from phosphorylated serine, threonine and tyrosine residues in proteins.<sup>18</sup> UDG is a DNA

glycosylase responsible for excising uracil base from the damaged DNA.<sup>19</sup> M. SssI is a DNA methyltransferase from *Spiroplasma sp. strain MQ1* that specifically methylates all cytosine residues (C<sup>5</sup>) within CpG sequences.<sup>20</sup> Catalase catalyzes the decomposition of hydrogen peroxide (H<sub>2</sub>O<sub>2</sub>) to water (H<sub>2</sub>O) and oxygen (O<sub>2</sub>).<sup>21</sup> SA and BSA are two commonly used irrelevant proteins. Theoretically, none of these samples can remove 5' phosphate groups of the phosphorylated T7 promoter strand to protect T7 promoter from digestion by  $\lambda$  exo, thus no transcription reaction occurs and no fluorescence signal can be detected. As shown in Fig. S6, a high fluorescence signal can only be observed in the presence of target ALP (Fig. S6, red column). In contrast, extremely low fluorescence signals are detected in response to PP (Fig. S6, brown column), UDG (Fig. S6, green column), M. SssI (Fig. S6, orange column), GO (Fig. S6, blue column), catalase (Fig. S6, pink column), SA (Fig. S6, gray column), and BSA (Fig. S6, purple column), with no obvious changes compared to that obtained from the control group without any treatment (Fig. S6, black column), indicating these samples cannot interfere the detection of ALP. To further investigate the assay performance in real sample analysis, we performed recovery studies by adding varying-concentration ALP (1, 2, and 5 U/L) to the ALP-free fetal bovine serum samples.<sup>9</sup> As shown in Table S3, a quantitative recovery rate ranging from 99% to 101% is obtained, demonstrating that this assay is not affected by the complex biological matrix. Our assay is superior to the state intramolecular proton transfer (ESIPT)-based assay,<sup>9</sup> in which the fluorescence signal produced by detection probe is strongly interfered by FBS. These results demonstrate the high accuracy and good selectivity of the proposed method.

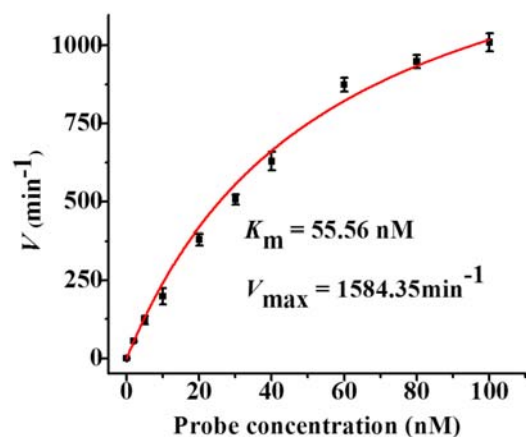

**Fig. S7** Analysis of Michaelis–Menten kinetic parameters by the initial-rate method. The ALP concentration is 5 U/L. The time for ALP incubation is 5 min. Error bars show the standard deviation of three experiments.

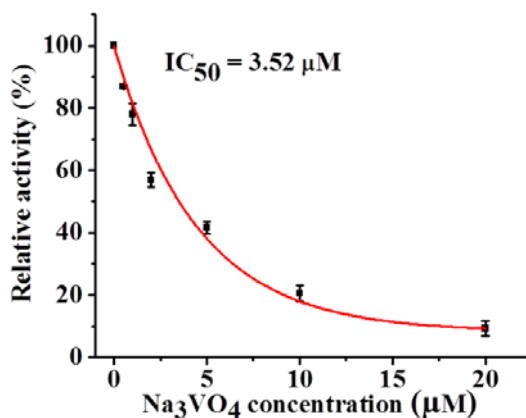

**Fig. S8** Variance of the reactive activity in response to the different-concentration  $\text{Na}_3\text{VO}_4$ . The ALP concentration is 5 U/L. Error bars show the standard deviation of three experiments.

## REFERENCES

1. L. Lin, Y. Liu, J. Yan, X. Wang and J. Li, *Anal. Chem.*, 2013, **85**, 334-340.
2. X. Lin, C. Zhang, Y. Huang, Z. Zhu, X. Chen and C. J. Yang, *Chem. Commun.*, 2013, **49**, 7243-7245.
3. B.-C. Yin, Y.-Q. Liu and B.-C. Ye, *J. Am. Chem. Soc.*, 2012, **134**, 5064-5067.
4. F. Zheng, S. Guo, F. Zeng, J. Li and S. Wu, *Anal. Chem.*, 2014, **86**, 9873-9879.
5. L. Zhang, J. Zhao, M. Duan, H. Zhang, J. Jiang and R. Yu, *Anal. Chem.*, 2013, **85**, 3797-3801.
6. H. Huang, B. Wang, M. Chen, M. Liu, Y. Leng, X. Liu, Y. Li and Z. Liu, *Sensors and Actuators B: Chemical*, 2016, **235**, 356-361.
7. S.-J. Li, C.-Y. Li, Y.-F. Li, J. Fei, P. Wu, B. Yang, J. Ou-Yang and S.-X. Nie, *Anal. Chem.*, 2017, **89**, 6854-6860.
8. Z. Qian, L. Chai, C. Tang, Y. Huang, J. Chen and H. Feng, *Anal. Chem.*, 2015, **87**, 2966-2973.
9. Z. Song, R. T. K. Kwok, E. Zhao, Z. He, Y. Hong, J. W. Y. Lam, B. Liu and B. Z. Tang, *ACS Appl. Mater. Interfaces*, 2014, **6**, 17245-17254.
10. Z. Hu, J. Chen, Y. Li, Y. Wang, Q. Zhang, E. Hussain, M. Yang, S. A. Shahzad, D. Yu and C. Yu, *Talanta*, 2017, **169**, 64-69.
11. M. I. Halawa, W. Gao, M. Saqib, S. A. Kitte, F. Wu and G. Xu, *Biosens. Bioelectron.*, 2017, **95**, 8-14.
12. J. Li, L. Si, J. Bao, Z. Wang and Z. Dai, *Anal. Chem.*, 2017, **89**, 3681-3686.
13. P. Miao, L. Ning, X. Li, Y. Shu and G. Li, *Biosens. Bioelectron.*, 2011, **27**, 178-182.

14. L. Zhang, T. Hou, H. Li and F. Li, *Analyst*, 2015, **140**, 4030-4036.
15. H. Jiao, J. Chen, W. Li, F. Wang, H. Zhou, Y. Li and C. Yu, *ACS Appl. Mater. Interfaces*, 2014, **6**, 1979-1985.
16. Z. Gao, K. Deng, X.-D. Wang, M. Miró and D. Tang, *ACS Appl. Mater. Interfaces*, 2014, **6**, 18243-18250.
17. J. Zhang, L. He, X. Zhang, J. Wang, L. Yang, B. Liu, C. Jiang and Z. Zhang, *Sensors and Actuators B: Chemical*, 2017, **253**, 839-845.
18. A. Yamagata, D. B. Kristensen, Y. Takeda, Y. Miyamoto, K. Okada, M. Inamatsu and K. Yoshizato, *Proteomics*, 2002, **2**, 1267-1276.
19. L.-j. Wang, M. Ren, Q. Zhang, B. Tang and C.-y. Zhang, *Anal. Chem.*, 2017, **89**, 4488-4494.
20. P. Renbaum, D. Abrahamove, A. Fainsod, G. G. Wilson, S. Rottem and A. Razin, *Nucleic Acids Res.*, 1990, **18**, 1145-1152.
21. A. K. Sinha, *Anal. Biochem.*, 1972, **47**, 389-394.
